11 **Abstract:**

12 Six neuropeptides are expressed within the *Drosophila* brain circadian network. Our previous  
13 mRNA profiling suggested that AllatostatinC is a seventh neuropeptide and specifically  
14 expressed in dorsal clock neurons (DN1s). Our results here show that AstC is indeed expressed  
15 in DN1s, where it oscillates. AstC is also expressed in two less well-characterized circadian  
16 neuronal clusters, the DN3s and lateral posterior neurons (LPNs). Behavioral experiments  
17 indicate that clock neuron-derived AstC is required to mediate evening locomotor activity under  
18 short (winter-like) photoperiods. The AstC-Receptor 2 (AstC-R2) is expressed in LNds, the  
19 clock neurons that drive evening locomotor activity, and AstC-R2 is required in these neurons to  
20 modulate the same short photoperiod evening phenotype. *Ex vivo* calcium imaging indicates that  
21 AstC directly inhibits a single LNd neuron. The results suggest that a novel AstC/AstC-R2  
22 signaling pathway, from dorsal circadian neurons to an LNd, regulates the behavioral response to  
23 changing photoperiod in *Drosophila*.

24

25 **Keywords:** Neuropeptide; Circadian rhythms; Photoperiod; Seasonal adaptation; Behavior;  
26 Locomotion; Circadian circuitry; *Drosophila*

27 Organisms ranging from cyanobacteria to mammals exhibit circadian rhythms or behavioral and  
28 physiological processes that occur in a near 24-hour cycle. The molecular clocks that drive these  
29 rhythms are sensitive to environmental cues, which provide time-of-day information. Indeed, one  
30 important feature of circadian clocks is their plasticity or their ability to re-entrain to different  
31 environmental conditions. Clocks can detect fluctuations in light and temperature and adjust  
32 features accordingly [1]. This allows adaptation to changing environments, such as seasonal  
33 photoperiods and temperatures.

34         The fruit fly *Drosophila melanogaster* is no exception. Under standard 12:12 light/dark  
35 (LD) cycles, it manifests a bimodal locomotor activity pattern with prominent and characteristic  
36 morning (M) and evening (E) peaks near the lights-on and lights-off transitions, respectively.  
37 Importantly, these peaks show anticipatory behaviors that precede these transitions. Flies also  
38 adjust these two locomotor activity events to photoperiod length; this presumably reflects an  
39 adaptation to different seasonal conditions. For instance, the M- and E-peaks are further apart  
40 under long, summer-like days and closer together under short, winter-like days [2].

41         These behavioral rhythms are driven by ~150 clock neurons within the fly brain. They  
42 are subdivided into distinct neuronal clusters: the small and large lateral neurons (s-LNvs and l-  
43 LNvs, respectively), the dorsal lateral neurons (LNds), the lateral posterior neurons (LPNs) and  
44 the dorsal neurons (DNs). The DNs are the largest group and are further subdivided into two  
45 anterior DN1s (DN1as), sixteen posterior DN1s (DN1ps), two DN2s, and approximately 30-40  
46 DN3s. The s-LNvs are also known as morning cells (M-cells) as they are primarily responsible  
47 for the timing of the M-peak, whereas the LNds (along with the 5<sup>th</sup> s-LNv) are also known as the  
48 evening cells (E-cells) as they drive the E-peak [3, 4].

49           The different clock neuron subgroups must communicate within the circadian network,  
50 for example to maintain synchrony of their molecular clocks, especially in the face of varying  
51 environmental conditions. Although neuronal communication can occur via gap junctions and  
52 neurotransmitters as well as neuropeptides, we have focused here on neuropeptides. To date,  
53 only six different neuropeptides have been identified within the circadian neurons. The  
54 neuropeptide pigment-dispersing factor (PDF) is expressed in the LNvs, acts as the  
55 synchronizing signal to most of the other circadian neurons, and is necessary to maintain  
56 rhythmicity in constant darkness [5] [6] [7]. The l-LNvs also express neuropeptide F (NPF) [8],  
57 and the s-LNvs co-express short NPF (sNPF) [9]. The activity-promoting E-cells express several  
58 different neuropeptides: the 5<sup>th</sup> s-LNv and five of the six LNds express a combination of NPF,  
59 sNPF, and ion transport peptide (ITP) [8] [9] [10]. Among the DN1s, the two DN1as are  
60 anatomically and functionally distinct from the DN1ps, partly due to expression of the  
61 neuropeptide IPNamide in the DN1as [11]. The neuropeptide diuretic hormone 31 (Dh31) is  
62 synthesized in five of the DN1ps to influence sleep [12] and possibly temperature preference  
63 [13]. In contrast, there are no neuropeptides associated with any of the remaining circadian  
64 clusters and neurons: the DN2s, DN3s, the LPNs, and most of the DN1ps.

65           To identify additional circadian neuropeptides, we exploited RNA-seq data generated  
66 from purified LNvs, LNds, and DN1ps to identify known neuropeptide transcripts that are  
67 strongly expressed in circadian neurons [14]. We prioritized the DN1p cluster for the possibility  
68 of identifying additional neuropeptides, especially within those neurons with uncharacterized  
69 signaling mechanisms. Allatostatin C (AstC) transcripts were highly expressed in the DN1ps and  
70 found at much lower levels in the LNvs and the LNds [14]. Intriguingly, transcripts encoding the

71 AstC receptor 2 (AstC-R2) were also detected in the LNds [14]. Thus, we predicted that  
72 AstC/AstC-R2 would be a novel intra-clock signaling pathway.

73 Indeed, AstC is expressed in the DN1s as predicted; it is also expressed in the DN3s and  
74 the LPNs. Knockdown experiments indicate that AstC-expressing clock neurons contribute to the  
75 advance in evening phase that occurs under a short photoperiod (6:18 LD). Importantly, knock-  
76 down of AstC-R2 within the LNds also exhibits the same phenotype as the AstC knockdown,  
77 indicating that dorsal neurons communicate with the LNds. *Ex vivo* calcium imaging indicates  
78 that AstC directly inhibits a single LNd neuron. These experiments therefore identify a novel  
79 AstC/AstC-R2 pathway that regulates evening phase under specific environmental conditions.

## 80 Results

### 81 Identifying AstC as a novel circadian neuropeptide

82 To characterize gene expression within subpopulations of the *Drosophila* circadian neural  
83 network, our lab previously conducted mRNA profiling on the LNvs, LNds, and a subset of the  
84 DN1ps (Figure 1a), and we focused on neuropeptide transcripts [14]. The sequencing data  
85 indicated high levels of the *Allatostatin-C* (*AstC*) transcript in DN1ps, whereas there are lower  
86 levels in the LNds (three times lower;  $p < 0.0001$ ) and no detectable *AstC* transcript in the LNvs  
87 (Figure 1b).

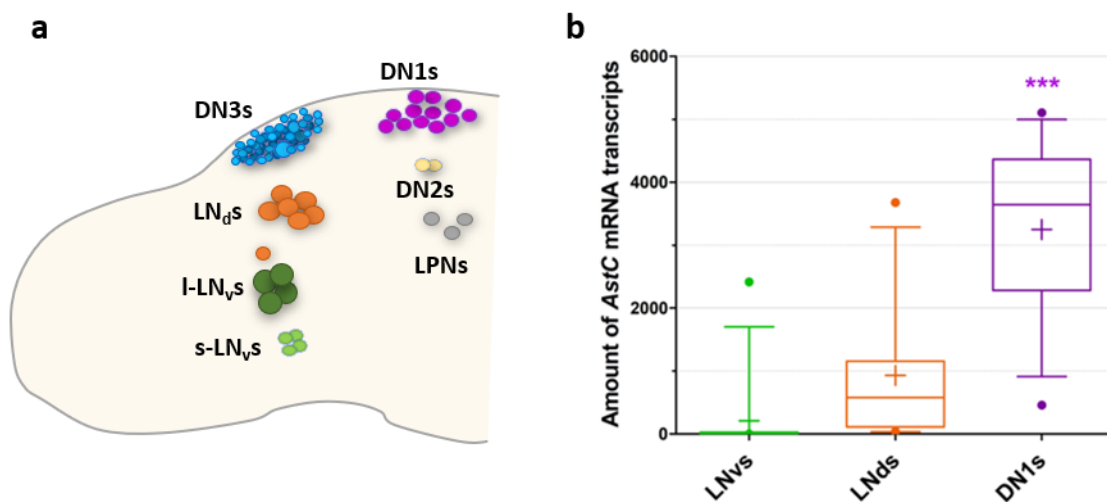

**Figure 1.** mRNA sequencing data suggests that *Allatostatin C* (*AstC*) mRNA is expressed in the circadian neurons of *Drosophila*. **a.** One hemisphere of the clock neurons in an adult *Drosophila* brain are depicted schematically. The core clock consists of about 150 lateral and dorsal neurons (LNs and DNs, respectively). The ventral LNs are subdivided in the small (s-LNvs) and large neurons (I-LNvs), shown in light and dark green, respectively. The dorsal LNs (LNds) consists of six neurons and the 5<sup>th</sup> s-LNv, shown in orange. The DNs are subclassified into the approximate 16 DN1s (shown in purple), two DN2s (shown in yellow), and approximately 30-40 DN3s (shown in blue). The three lateral posterior neurons (LPNs) form the last cluster (shown in gray). **b.** Amount of *AstC* mRNA transcripts in the three neuronal clusters profiled with deep sequencing: the LNvs, LNds (including the 5<sup>th</sup> s-LNv), and the posterior DN1s. The DN1s have significantly more *AstC* transcripts compared to the LNvs and LNds. Values were averaged from 12 sequencing data sets across different timepoints and biological replicates. Boxplot whiskers show 10<sup>th</sup>-90<sup>th</sup> percentile. “+” denotes the mean. \*\*\*  $p < 0.0001$ , one-way ANOVA.

88 AstC is known to bind to two G-protein coupled receptors: AstC-R1 (star1) and AstC-R2  
89 (AICR2) [15]. *AstC-R1* expression was not detectable in the three circadian neuronal groups, but

90 *AstC-R2* transcripts was present in the LNds [14]. Because the transcripts for the peptide and one  
91 of its receptors were expressed within circadian neurons, we predicted that *AstC* plays a role in  
92 the clock network and pursued these initial findings.

93

#### 94 ***AstC* is expressed in the DN1ps, DN3s, and LPNs**

95 To confirm that *AstC* transcripts are indeed present in the clock neurons, we took advantage of a  
96 recently published fluorescent *in situ* hybridization (FISH) protocol to visualize *AstC* mRNA in  
97 whole-mount adult *Drosophila* brains (Figure 2a; see materials and methods). The transcripts  
98 were detectable in approximately six neurons in the dorsal protocerebrum, a distribution that is  
99 quite similar to previously schematized diagrams of *AstC* distribution in adult fly brains [16]. To  
100 confirm that these are indeed dorsal circadian neurons, we co-stained with antibody against the  
101 core clock transcription factor TIMELESS (TIM). The brains were stained at ZT24, a time when  
102 TIM protein is abundant (Figure 2b) [17] [18]. Of the five or six *AstC*-positive neurons in the  
103 dorsal brain, only four co-stain with TIM protein (Figure 2c), suggesting that this cluster contains  
104 four DN1ps, as well as one or two immediately adjacent non-circadian neurons. Surprisingly,  
105 *AstC* is also expressed in two additional circadian clusters, the DN3s and the LPNs (Figure 2c);  
106 these two groups were not profiled [14]. We did not observe *AstC* transcripts in the location of  
107 the LNds (data not shown), indicating that the low *AstC* transcript levels in the LNds indicated  
108 by the sequencing is not detectable by FISH or perhaps reflects non-specific background from  
109 the RNA sequencing (Figure 1b; see Methods).

110 To test whether the *AstC* mRNA is translated into functional peptide within the circadian  
111 neurons, we performed co-immunostaining on adult brains during the late night (ZT20) using  
112 antibodies against *AstC* (Figure 2d) and TIM (Figure 2e). The expression pattern of *AstC* is very

113 similar to that observed by FISH. The co-localization of AstC and TIM confirms that the AstC  
114 peptide is expressed in four DN1ps, approximately 20 of the ~30-40 DN3s neurons, and the three  
115 LPNs (Figure 2*f*). AstC is also present within elaborate arborizations in the dorsal regions.  
116 Notably, there is a pair of massive non-circadian bi-lateral neurons near the LPNs, which are  
117 AstC-positive with likely extensive processes in nearly the entire brain; these cells were  
118 previously annotated as posterior medial protocerebral 2 neurons [16, 19] (PMP2; Figure 2*d* and  
119 2*f*, asterisk).  
120

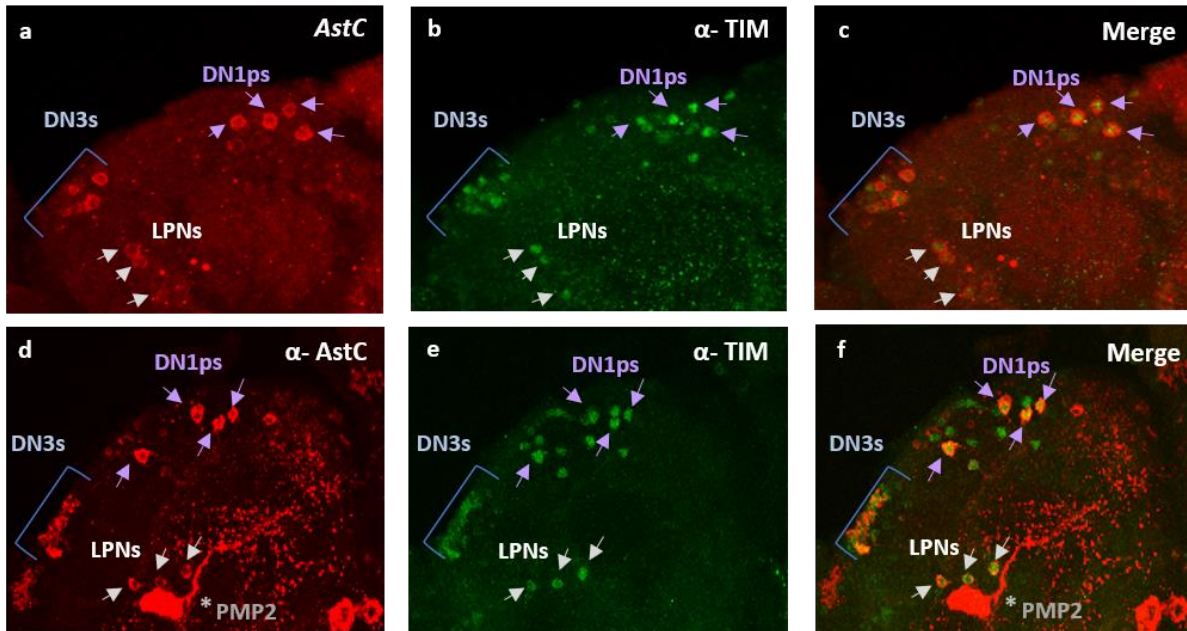

**Figure 2.** Visualizing AstC in the clock neurons of the adult *Drosophila* brain. *a.* Fluorescent *in situ* hybridization (FISH) for *AstC* mRNA transcripts at ZT24. *b.* TIM antibody staining showing the dorsal clock neurons. *c.* FISH coupled with immunostaining shows the co-localization of *AstC* mRNA transcripts (red) and TIM antibody (green), revealing *AstC* transcripts in four DN1ps (purple arrows), three LPNs (white arrows), and the DN3s (blue bracket). *d.* Immunostaining of the AstC neuropeptide at ZT20. The posterior medial protocerebral 2 (PMP2, asterisk) are previously known to contain AstC. *e.* TIM antibody staining showing the dorsal clock neurons. *f.* Co-localization of AstC neuropeptide (red) is indeed expressed in a subset of the dorsal clock neurons (anti-TIM, green): four DN1ps (purple arrows), three LPNs (white arrows), and the DN3s (blue bracket). Images are from maximum projections. Only the posterior, dorsal region of one hemisphere are shown here. See also Figure S1.



121 AstC is the first identified neuropeptide in the enigmatic DN3 and LPN circadian  
122 clusters. Because previous work from our lab identified the neurotransmitter glutamate within  
123 the subset of the DN1ps known to express Dh31 [20], we asked whether AstC is also expressed  
124 within this subset of glutamatergic DN1ps. To this end, we expressed GFP with a specific DN1p  
125 driver (*R51H05-GAL4*) known to include Dh31 [12] and glutamate [20]. The co-immunostaining  
126 with antibodies against AstC and GFP indicated that the four AstC-positive DN1ps are indeed  
127 included within this subset that also produces Dh31 and glutamate (Figure S1).

128 We next asked whether AstC protein levels changes (cycles) in these dorsal clock  
129 neurons as a function of time-of-day. We expressed GFP in a subset of the DN1ps and conducted  
130 immunohistochemistry co-labeling with anti-GFP and anti-AstC antibodies at six timepoints  
131 throughout the 12:12 light:dark (LD) day: ZT0, 4, 8, 12, 16, and 20 (Figure 3).

132 Indeed, AstC cycles throughout the day in the DN1ps: AstC is dramatically reduced  
133 during the light phase (between ZT0 and 4), and it accumulates throughout the dark phase,  
134 reaching a maximum near ZT20 (Figure 3*b*, *dashed*). To address whether this cycling pattern in  
135 the DN1ps is light-driven, we conducted the same immunolabeling experiment in constant  
136 darkness (DD) and observed the same DN1p cycling pattern in DD (Figure 3*b*, *solid*), indicating  
137 that this is light-independent and therefore almost certainly clock-driven.

138 The DN3s were identified by their anatomical location. Because AstC can be easily  
139 visualized with immunohistochemistry at all time points in LD and DD (Figure S2), we suspect  
140 that there is little cycling in this large circadian cluster. However, it is impossible to detect AstC  
141 cycling in a subset of the cluster without a stable co-stain like GFP in specific DN3 neurons. The

142 LPNs are also difficult to visualize across timepoints but for a different reason: they are often  
143 obscured by the enormous PMP2 neuron that can completely eclipse this clock cluster.

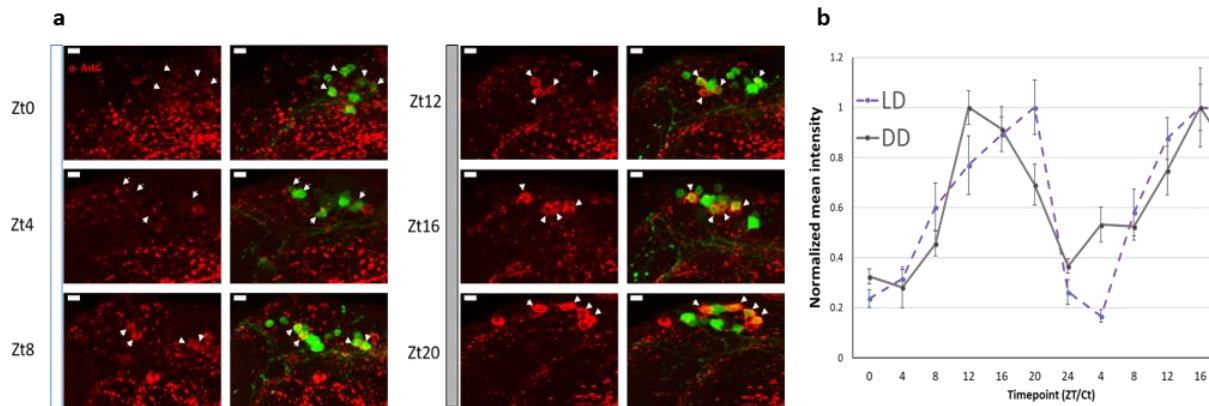

**Figure 3.** AstC cycles in the DN1ps. Young males flies expressing GFP in a subset of the DN1ps (*clk4.1-GAL4*) were entrained to six timepoints throughout the day under a 12:12 light:dark (LD) cycle. **a.** Representative images of the DN1ps immunolabeled with anti-AstC (red) and GFP (green). The arrowheads indicate which four AstC-expressing neurons co-localize as the DN1ps. **b.** Normalized quantification of AstC cycling in the DN1ps under 12:12 LD cycle (dashed, open circles) and the second day of constant darkness (DD, solid, closed circles). AstC is more abundant during the dark phase in comparison to the light phase. Two biological replicates are double-plotted. Error bars are SEM. Images are from maximum projections.  $n \geq 5$  brains per condition. Scale bar= 5 $\mu$ m. See also Figures 2.

144

145 **AstC in the clock neurons contributes to proper timing of the evening phase in a short**  
146 **photoperiod**

147 To explore the function of AstC within the clock network, we knocked-down *AstC* mRNA levels  
148 in all clock cells via *tim*-GAL4 driver-mediated expression of an RNAi and then examined the  
149 locomotor behavior of these flies under standard 12:12 LD conditions (see materials and  
150 methods). We hypothesized that AstC produced in the dorsal neurons may bind to the AstC-R2  
151 in the LNds and affect the evening activity peak (E-peak). However, the behavior of the AstC  
152 knockdown and control flies was indistinguishable under these standard conditions (Figure 4a).  
153 The amplitude and timing of the E-peak were also not significantly different among the

154 genotypes ( $p > 0.05$ ; Figure 4*b*). The negative result was probably not due to inefficient  
155 knockdown as indicated by immunostaining of the AstC RNAi strain (Figure S3).

156       Hyperactivity generated by the lights-off event at ZT12 in standard 12:12 LD conditions  
157 can override or “mask” more subtle effects on the evening peak [21]–[22]. We therefore sought  
158 to uncouple the “true” E-peak from this photo-entrainment effect by assaying flies under short  
159 photoperiod conditions. To this end, flies were then shifted to 6:18 LD (6 hours light and 18  
160 hours dark) cycles after one week of entrainment under more standard 12:12 LD conditions.  
161 Under these 6:18 LD conditions, control flies exhibit an interruption of their day-time siesta by  
162 the lights-off transition at ZT6 with the maximum E-peak occurring approximately two hours  
163 later at ZT8 (Figure 3*c, d*). Flies lacking AstC show a very similar locomotor behavior pattern;  
164 however, the E-peak is delayed  $\sim 1$  hour (Figure 3*c*; *arrow*). Quantification of the maximum  
165 evening peak in individual flies showed that there was a significant delay in the timing of the  
166 evening peak when AstC was knocked-down in clock neurons ( $9.34 \pm 0.11$  hrs) in comparison to  
167 the controls (GAL4:  $8.07 \pm 0.15$  hrs; UAS:  $7.92 \pm 0.09$  hrs;  $p < 0.0001$ ; Figure 3*c, d*; Figure S4).  
168 Because *tim*-GAL4 also drives expression in the eyes, we knocked-down AstC only in the eye  
169 with *GMR*-GAL4 driver; there were no significant behavioral differences ( $p > 0.05$ ; Figure S5),  
170 strongly indicating that AstC in the brain is responsible for mediating this short period evening  
171 locomotor behavior phenotype.

172

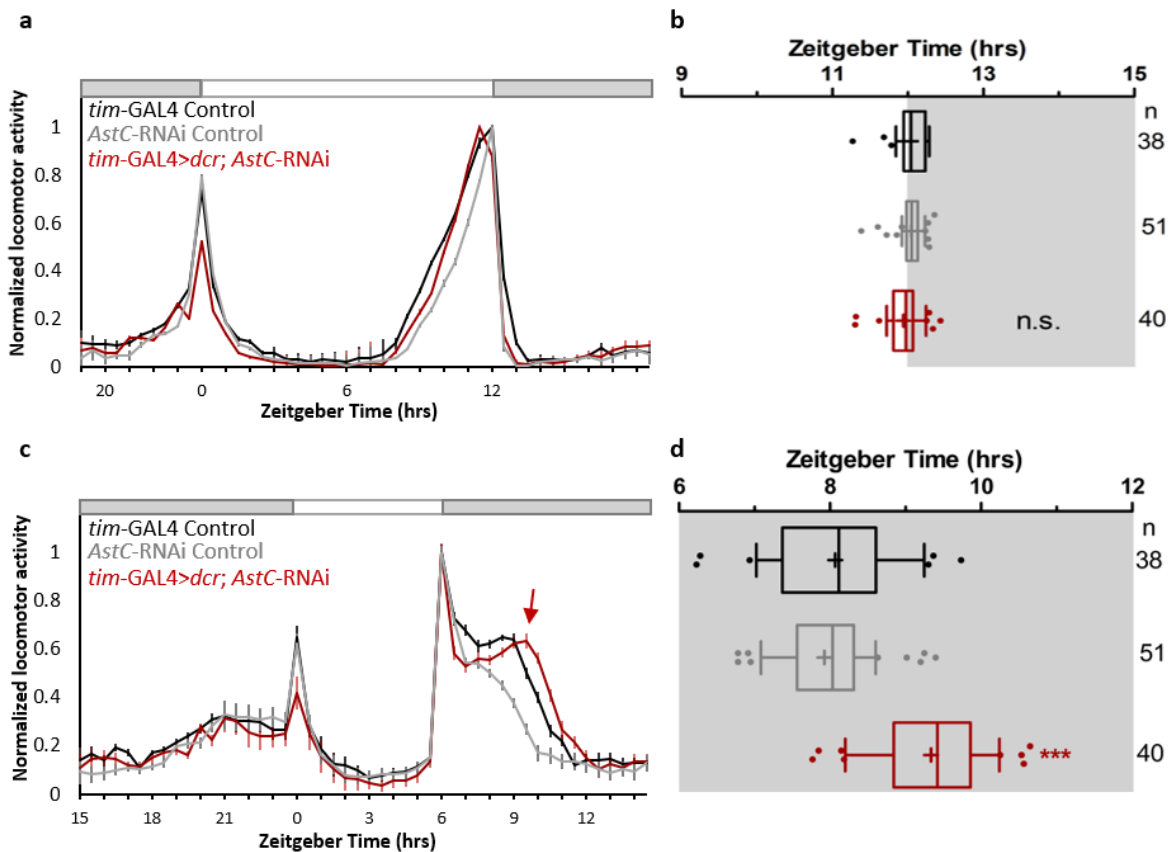

**Figure 4.** AstC in clock neurons regulates evening phase in short photoperiod days. *a*. Normalized averaged actograms of the *tim*-GAL4 control (black, n=38), *AstC*-RNAi control (gray, n=51), and the *AstC* RNAi knock-down in all clock cells mediated by *tim*-GAL4 (red, n=40) under standard 12:12 light:dark (LD) conditions at 27°C. White and dark boxes indicates the respective light and dark phases. The error bars represent SEM. *b*. Boxplot distribution showing the evening peak phase from individual flies. There are no significant differences ( $p \geq 0.05$ ). *c*. Normalized averaged actograms of the *tim*-GAL4 control, *AstC*-RNAi control, and the *AstC* RNAi knock-down in all clock cells mediated by *tim*-GAL4 under short photoperiods of 6:18 LD at 27°C. The red arrow denotes the delay of the evening peak when *AstC* is knocked-down compared to the two genetic controls. *d*. Boxplot distribution showing the evening peak phase from individual flies. The *tim*-GAL4 mediated *AstC*-RNAi knock-down (red) is significantly delayed compared to both the *tim*-GAL4 control (black) and *AstC*-RNAi control (gray;  $p < 0.0001$ ). These data are combined from two independent biological replicates. \*\*\*  $p < 0.0001$ . n.s. no significant difference ( $p \geq 0.05$ ). "+" indicates the mean and the whiskers denotes the 10<sup>th</sup>/90<sup>th</sup> percentiles. See also Figures S3, S4, S5, and S6.

173

174

To determine which *AstC*-positive clock neurons are responsible for this effect, we

175

utilized well-characterized circadian drivers to limit the RNAi expression to more restricted sub-

176 populations. *clk856*-GAL4 targets nearly the entire clock network [23], including the four AstC-  
177 positive DN1ps and three LPNS (Figure S6). However, we did not observe significant changes in  
178 the evening peak compared to the controls ( $p > 0.05$ ; Figure S5), indicating that AstC from the  
179 DN1ps and LPNs is probably not required for mediating the evening phase in short photoperiod  
180 conditions. We also did not observe significant differences when AstC was downregulated in the  
181 DN1ps with *clk4.1M*-GAL4 ( $p > 0.05$ ; Figure S5), also suggesting that DN1 AstC is not  
182 responsible for the phenotype. These negative data suggest that the remaining AstC-expressing  
183 DN3s, unlabeled with the *clk856*-GAL4 and *clk4.1M*-GAL4, may be responsible for mediating  
184 the short photoperiod evening peak phenotype (Figure S5; Figure S6).

185

#### 186 **AstC acts upon AstC-R2 in the LNds**

187 Given the role of the LNds in generating the evening locomotor activity peak [3] [4], we  
188 predicted that AstC acts upon the LNds to affect the evening phase short photoperiod phenotype.  
189 Of the two receptors, only *AstC-R2* mRNA was detected in the LNds by RNA-sequencing [14].  
190 We therefore knocked-down AstC-R2 in the LNds using *dvPDF*-GAL4, *PDF*-GAL80 mediated  
191 RNAi expression (Figure 5). Although the AstC-R2 knock-down was nearly identical to the  
192 controls in standard 12:12 LD conditions (Figure 5a, b), there was a significant delay in the  
193 timing of the E-peak in the AstC-R2 knock-down ( $9.74 \pm 0.18$  hrs) compared to the genetic  
194 controls (GAL4:  $8.35 \pm 0.13$  hrs; UAS:  $8.18 \pm 0.23$  hrs;  $p < 0.0001$ ; Figure 5c, d) under 6:18 LD  
195 conditions. Similar effects were seen using a second and novel split GAL4 driver line (*MB122B*-  
196 *sGAL4*; (Guo, 2017 #9704) [24], which also targets the LNds (Figure S7), i.e., there was a  
197 significant delay ( $p < 0.001$ ) in the timing of the E-peak in the knock-down strain ( $9.05 \pm 0.26$   
198 hrs) compared to the genetic controls (*sGAL4*:  $7.87 \pm 0.10$  hrs; UAS:  $8.18 \pm 0.23$  hrs). These

199 phenotypes are essentially identical to those from the AstC knockdowns (Figure 4) and strongly  
 200 suggest that AstC from dorsal circadian neurons binds to AstC-R2 in the LNds to regulate the  
 201 timing of the evening peak.

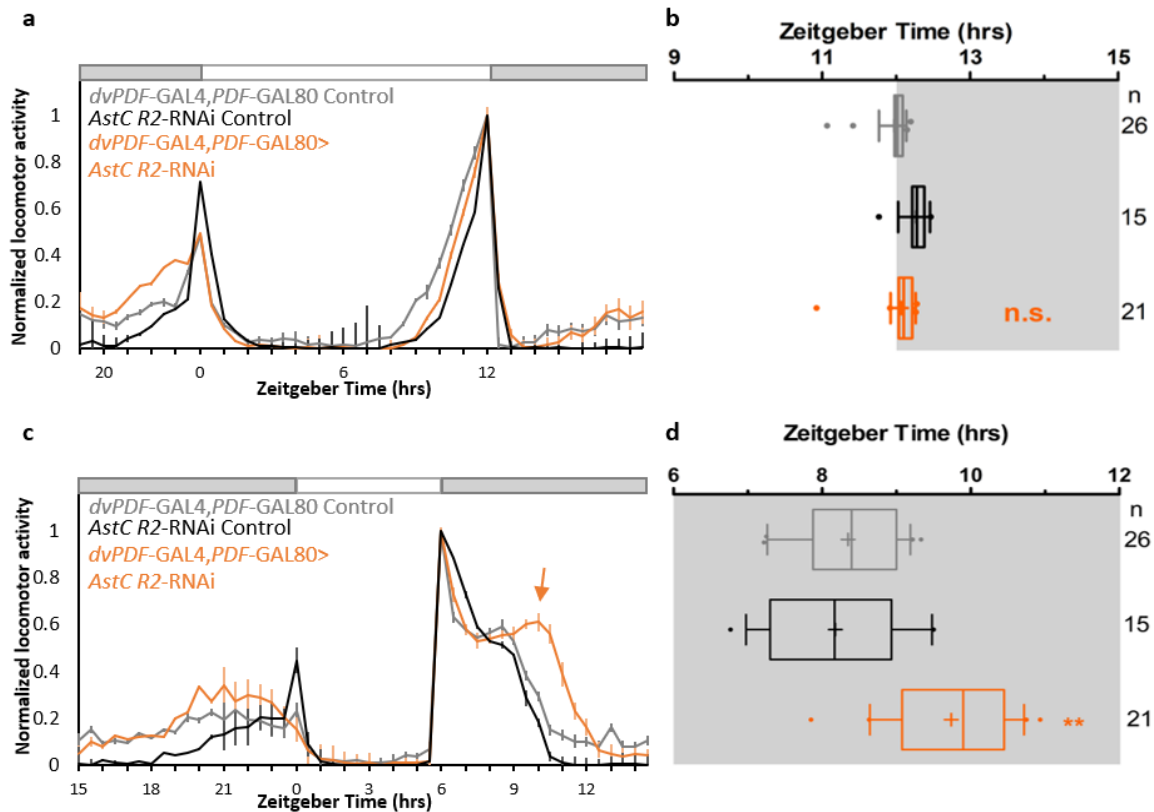

**Figure 5.** AstC-R2 in LNds is required to regulate evening phase in short photoperiod days. **a.** Normalized averaged actograms of the *dvPDF-GAL4, PDF-GAL80* control (gray, n=26), *AstC R2-RNAi* control (black, n=15), and the *AstC R2-RNAi* knock-down in the LNds mediated by *dvPDF-GAL4, PDF-GAL80* (orange, n=21) under standard 12:12 LD condition at 27°C. White and dark boxes indicate the respective light and dark phases. The error bars represent SEM. **b.** Boxplot distribution showing the evening peak phase from individual flies. There are no significant differences ( $p \geq 0.05$ ). **c.** Normalized averaged actograms of the *dvPDF-GAL4, PDF-GAL80* control, *AstC R2-RNAi* control, and the *AstC R2 RNAi* knock-down in the LNds mediated by *dvPDF-GAL4, PDF-GAL80* under short photoperiod of 6:18 LD at 27°C. The orange arrow denotes the delay of the evening peak when *AstC R2* is knocked-down compared to the two genetic controls. **d.** Boxplot distribution showing the evening peak phase from individual flies. The *dvPDF-GAL4, PDF-GAL80* mediated *AstC R2-RNAi* knock-down (orange) is significantly delayed compared to both the *dvPDF-GAL4, PDF-GAL80* control (gray) and *AstC R2-RNAi* control (black;  $p < 0.001$ ). \*\*  $p < 0.001$ . n.s. no significant difference ( $p \geq 0.05$ ). “+” indicates the mean and the whiskers denotes the 10<sup>th</sup>/90<sup>th</sup> percentiles. See also Figure S7.

202 To address how AstC may modulate the LNds, we conducted functional imaging with the  
 203 calcium sensor GCaMP6f. Young adult fly brains were collected in the evening between ZT9-12,

204 when LNd calcium is expected to be highest [24, 25]. A baseline period was recorded before  
205 exposing the explanted brains to 10 $\mu$ M of synthetic AstC peptide (see methods). We observed  
206 significant decreases in fluorescence in a subset of the LNds upon AstC application, indicating  
207 that these neurons were inhibited (Figure 6*a, b*).

208         Because the number of inhibited LNds neurons varied widely from only one to five, we  
209 were concerned about indirect network interference. To address the extent to which AstC directly  
210 inhibits the LNds, the same functional imaging experiments were conducted in the presence of  
211 tetrodotoxin (TTX), a voltage-gated sodium channel blocker. Similar decreases of LNd  
212 fluorescence signal were observed (Figure 6*c, d*), indicating that AstC indeed directly inhibits the  
213 LNds. However, there was much less variability in the number of responsive LNds in TTX.  
214 Although most of the LNds showed no significant changes compared to baseline recording upon  
215 AstC application (Figure 6*d*, gray), a single LNd neuron was consistently responsive with a  
216 dramatically decreased calcium signal (Figure 6*cii*, asterisk; 6*d*, red). These data indicate that  
217 AstC directly inhibits a single LNd neuron, indicating striking specificity within a substantially  
218 heterogeneous clock neuronal cluster.

219

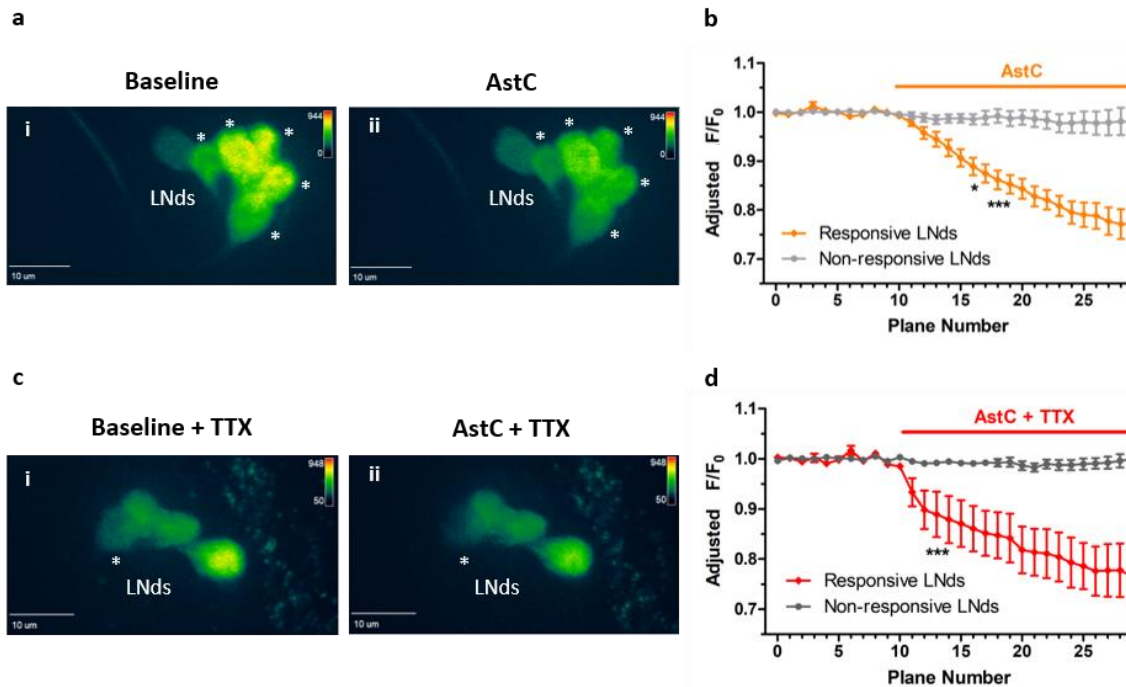

**Figure 6.** Functional calcium imaging of the LNDs responding to AstC (10  $\mu$ M). Flies expressing the calcium sensor GCaMP6 in most clock neurons (*clk856-GAL4*> UAS-GCaMP6f) were collected in the evening, ZT9-12, and brains were explanted. **a.** A baseline recording of the LNDs was obtained for 10 planes (Ai). When the synthetic AstC peptide (10  $\mu$ M) was added into the bath, a substantial decrease in fluorescence was observed in multiple LND neurons (Aii, denoted by astericks). **b.** Quantification of the fluorescence relative to the initial baseline recording ( $F/F_0$ ) over time. The LND neurons showed either a significant decrease in calcium (orange, ‘Responsive LNDs’) or were unaffected (light gray, ‘Non-responsive LNDs’). **c.** To address whether AstC directly inhibited the LNDs, the same experiment was conducted with the sodium channel blocker tetrodotoxin (TTX) added to the bath. Similar to A, a baseline recording was obtained for the LNDs (Ci) before exposing the brains to AstC (Cii). The asterisk denotes the single LND neuron that showed a significant decrease in calcium in response to the AstC treatment. **d.** the quantification of the direct inhibition of AstC onto a single LND neuron (red, ‘Responsive LNDs’). Most LND neurons were unaffected.  $n = 6$  brains per condition. \*  $p < 0.05$ , \*\*\*  $p < 0.001$ , two-way ANOVA.



## 220 **Discussion**

221 To learn more about how the ~150 clock neurons within the adult fly brain communicate, we  
222 examined RNA sequencing data from the LNds, LNvs and DN1s for neuropeptides not yet  
223 associated with this circuitry. AstC was a promising candidate because mRNAs encoding both  
224 the peptide and one of its receptors (AstC-R2) were identified within the three clock neuron  
225 clusters; these data suggested a novel intra-clock circuitry signaling pathway. *AstC* transcripts as  
226 well as the neuropeptide are indeed well-expressed in the DN1s, and the neuropeptide signal  
227 undergoes strong cycling in DD as well as LD conditions. Moreover, AstC is also expressed in  
228 two other circadian neuron subgroups, the DN3s and the LPNs, and it is the first neuropeptide  
229 identified in these circadian clusters. Behavioral data after RNAi knockdown experiments  
230 indicate that the AstC binds to AstC-R2 expressed in E-cells to modulate the timing of evening  
231 locomotor activity. *Ex vivo* calcium imaging indicates that AstC directly inhibits a single LNd  
232 neuron.

233

## 234 **Functional role of AstC and AstC-R2 in clock neurons**

235 AstC is required in the clock neurons to regulate the evening locomotor activity phase in short  
236 photoperiods. The shift in the timing of the evening peak occurs when AstC is reduced in all  
237 circadian neurons (*tim*-GAL4 driver), and the DN1 cycling pattern suggests a circadian  
238 modulation of secretion. Although this temporal regulation could coincide with the timing of its  
239 effect on the phase of the evening locomotor peak, reducing AstC solely in the DN1ps using  
240 *clk4.IM-GAL4* was without effect (Figure S5). The LPNs are also probably not a key circadian  
241 source of AstC: their AstC levels were dramatically reduced in the *clk856*-GAL4 mediated  
242 knock-down, yet no phenotype was observed (Figure S5). All AstC-expressing DN3s are

243 targeted by the *tim*-GAL4 driver, and most of these DN3s are not included in the *clk856*-GAL4  
244 driver (Figure S6). These results suggest that the DN3s may be the source of AstC that is critical  
245 for the differences in evening locomotor activity. Unfortunately, this tentative conclusion is  
246 based on negative data, and the lack of a DN3-specific GAL4 driver makes it impossible to test  
247 this model directly. Therefore, we propose three possible models: 1) the DN3s are the primary  
248 source of AstC within the circadian circuit (Figure 7a); 2) the DN1s, DN3s, and LPNs, or some  
249 combination, are functionally redundant (Figure 7b); 3) A small amount of residual AstC within  
250 DN1s is sufficient for its behavioral role in the evening activity peak assay. Although neuron-  
251 specific deletion of *AstC* would contribute to distinguishing between these three possibilities, we  
252 do not have an accurate and efficient CRISPR-based strategy for achieving temporal and spatial  
253 specificity.

254

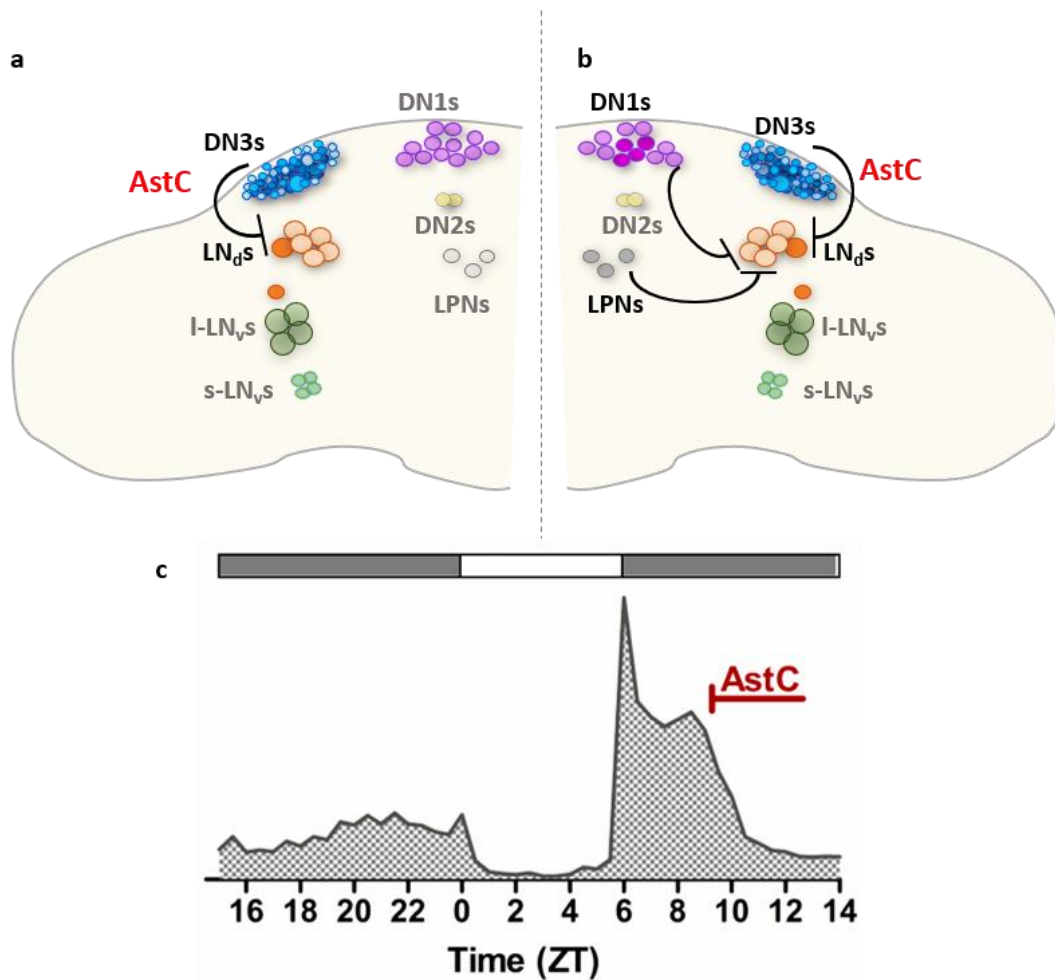

**Figure 7.** Proposed model for AstC/AstC-R2 signaling in the circadian circuitry of *Drosophila*. **a.** The DN3s are the integrator for light/dark duration to sense changes in photoperiod conditions. AstC solely in the DN3s inhibits a single LN<sub>d</sub> neuron via AstC-R2 to regulate the evening phase, as revealed under short photoperiod. **b.** It is unclear which group of clock neurons serves as the critical integrator of the different photoperiod conditions. Due to lack of a DN3-specific driver, we propose this second model: a combination of the AstC-containing DN1ps, DN3s, and LPNs, together inhibit an LN<sub>d</sub> neuron to regulate the evening peak, indicating a functional redundancy in neuropeptide signaling. **c.** The functional role of AstC is to precisely regulate the evening phase, as seen under short photoperiod condition. Because the reduction of AstC leads to a delay in the evening phase, AstC must normally act to regulate the locomotor evening offset.

255           Once released by dorsal circadian neurons, AstC signals to the LNds via binding to its  
256 receptor, AstC-R2. This is because AstC-R2 knock-down in the LNds and knockdown of AstC in  
257 the entire circadian circuit give rise to the identical phenotype, a delayed evening peak in short  
258 photoperiod conditions (Figure 4, Figure 5, Figure S7). Moreover, the DNs and the LNds both

259 extend projections to the dorsal protocerebrum region (near the pars intercerebralis), where they  
260 come in close proximity [26], which would facilitate neuropeptide transmission.

261 Our functional imaging strongly indicates that AstC binding to LN<sub>d</sub>-localized AstC-R2  
262 leads to neuronal inhibition. The effect is consistent with several previous electrophysiology  
263 experiments [15, 27, 28] and contributes to an emerging theme of LN<sub>d</sub> inhibition [20, 24, 25,  
264 29]. It is also one of the first pieces of evidence indicating that the dorsal neurons can be a source  
265 of inhibition onto the LN<sub>d</sub>s [20]. Interestingly, only a single LN<sub>d</sub> neuron is directly AstC-  
266 sensitive, further attesting to LN<sub>d</sub> heterogeneity [9] [8] [10] and suggesting that behavioral  
267 regulation of the evening phase under short photoperiod arises from this signaling to a single  
268 LN<sub>d</sub> neuron. The response of that neuron may be communicated to the rest of the LN<sub>d</sub>s, for  
269 example via gap junctions.

270 Previous studies provide hints that the DN3s could inhibit the LN<sub>d</sub>s. For example, the  
271 timing of the calcium phase in DN3s, a surrogate of neuronal activity, is coincident with a  
272 decrease in LN<sub>d</sub> calcium [24]. The same reciprocal relationship was also observed under short  
273 photoperiods. Under these conditions, the DN3s manifest an increase in calcium signaling  
274 immediately after the lights-off transition. This occurs immediately after the actual E-peak of  
275 locomotor activity and coincides with a calcium decrease in the LN<sub>d</sub>s [25]. Although more  
276 experiments are needed to support this hypothesis, it is possible that the DN3s may inhibit this  
277 single LN<sub>d</sub> via AstC release to modulate the proper timing of evening locomotor activity (Figure  
278 7a).

279 There are several caveats to this current model. First, due to the lack of functional RNAi  
280 lines available, a single RNAi line was used for both the AstC and AstC-R2 knockdown  
281 experiments. Although not ideal, this concern is partially alleviated by the observation that the

282 AstC and AstC-R2 knockdowns show essentially identical phenotypes suggesting that off-target  
283 effects are only minimally relevant. Second, we have been unable to rule out the possibility that  
284 the phenotypes observed in AstC knockdowns are not due to a requirement for AstC during  
285 development. Experiments to address this point are challenging because when the temperature is  
286 raised to reduce *tubgal80<sup>ts</sup>* repression and allow for adult-only knockdown, the heat itself  
287 drastically changes the timing of the evening peak. Third, lack of a DN3-specific driver has  
288 precluded determining whether DN3-derived AstC is required for this evening activity peak  
289 modulation, and whether the DN3s can directly inhibit the LNDs.

290

### 291 **A conserved role of allatostatin C/ mammalian somatostatin in photoperiodism**

292 Although the AstC peptide sequence is highly conserved among insect species [30] [31] [32],  
293 only the AstC-R2 receptor has a mammalian homolog, the somatostatin/galanin/opioid receptor  
294 family [15, 27, 28]. Inhibitory somatostatin (SST) interneurons are present in the mammalian  
295 equivalent of a central core clock, the suprachiasmatic nucleus (SCN) [33] [34] [35]. SST  
296 interneurons are also known to affect sleep [36] and circadian behaviors [34]. Interestingly, SST  
297 is associated with proper adaptation under short-day conditions for both diurnal and nocturnal  
298 mammals [37-39], suggesting a highly conserved function with AstC/AstC-R2 for adaptation  
299 under different seasonal environments. It will be interesting to see whether the SCN-resident  
300 SST interneurons are important for this adaptation, like the AstC-containing clock neurons  
301 described in this study.

302 **Methods**

303 *Drosophila* stocks

304 *D. melanogaster* strains were reared on standard cornmeal/agar medium supplemented with yeast  
305 under 12:12 LD cycles at 25 °C. The following transgenic flies were used for behavior: *Tim-*  
306 *GAL4* (*yw; Tim-GAL4/CyO*) [40], *Clk4.1M-GAL4* [41], *Clk856-GAL4* [23], *GMR-GAL4* [42],  
307 *dvPDF-GAL4* [43], *PDF-GAL80* [4], and *UAS-Dicer2*. The LNd *split-GAL4* (*JRC\_MB122B*)  
308 was provided by Gerald M. Rubin. *UAS-AstC* RNAi and *UAS-AstC-R2* RNAi lines (nos.  
309 102735KK and 106146KK, respectively) were from the Vienna *Drosophila* RNAi Center. The  
310 *GAL4* controls were crossed into the empty background vector of the RNAi (60100KK).  
311 Microscopy experiments involved *W<sup>118</sup>* for wild-type flies, *R51H05-GAL4* [44], and *UAS-*  
312 *EGFP*. Young, male flies were used for all experiments.

313

314 Quantification of mRNA sequencing data

315 mRNA profiling of specific clock neurons was previously described in [14, 45]. For the  
316 distribution of the differential sequencing of *AstC*, the mRNA transcripts were averaged across  
317 the entire *AstC* gene for each of the twelve data sets. The twelve independent data sets originate  
318 from two biological replicates of each of the six time-of-day collections. Statistical analysis was  
319 performed on the Prism 5 software (GraphPad) using a one-way ANOVA with a Tukey's  
320 multiple-comparisons test.

321

322 Fluorescent *in situ* hybridization (FISH)

323 FISH was performed as described previously [46] onto wild-type flies (*W<sup>118</sup>*) at ZT 24 with the  
324 following exceptions: custom oligo probes were ordered against the entire *Ast-C* mRNA

325 sequence, including the 5' and 3' untranslated regions, and conjugated with Quasar 670 dye  
326 (Stellaris Probes, Biosearch Technologies). For the hybridization reaction of the probes onto the  
327 brains, the oligo probes were diluted to a final concentration of 0.75  $\mu$ M. Immediately following  
328 the FISH protocol, the brains were blocked with 10% normal goat serum for two hours at room  
329 temperature before incubating in primary antibody overnight at 4°C ( $\alpha$ -TIM 1:200). The brains  
330 were then fluorescently labeled with Alexa Fluor 488 conjugated anti-rat at 1:500 for four hours  
331 at room temperature. Lastly, the brains were washed before mounting onto slides with  
332 Vectashield Mounting Medium (Vector Laboratories). The slides were immediately viewed on a  
333 Zeiss 880 series confocal microscope with a 25x oil objective. The z-stack was sequentially  
334 imaged in 0.8  $\mu$ m sections.

335

#### 336 Adult fly brain immunohistochemistry

337 Wild-type flies (*W<sup>1118</sup>*) were entrained for three days before collecting at their respective  
338 timepoints. Fly heads were fixed in PBS with 4% paraformaldehyde and 0.008% Triton X-100  
339 for 60-65 min at room temperature while rotating. Fixed heads were washed in PBS with 0.5%  
340 Triton X-100 (PBS-T) and then dissected in PBS-T. The brains were blocked in 10% normal  
341 goat serum (NGS; Jackson Immunoresearch) for an hour at room temperature. The brains were  
342 later incubated with primary antibodies at 4 °C for three nights. For TIM and AstC co-staining,  
343 rat anti-TIM antibody (1:200) and rabbit anti-*Manduca* AstC antibody (1:250, gift from Dr. Jan  
344 Veenstra) were used as primary antibodies. After three washes with PBST, the brains were  
345 incubated with Alexa Fluor 488-conjugated anti-rat and Alexa Fluor 635-conjugated anti-rabbit  
346 (Molecular Probes) at 1:500 dilutions in 10% NGS. After the brains were washed three more  
347 times, the brains were mounted in Vectashield Mounting Medium (Vector Laboratories). The

348 slides were immediately viewed on a Leica SP5 confocal microscope with a 20x objective and  
349 sequentially imaged in 0.8  $\mu\text{m}$  sections. For experiments showing the validation of the RNAi  
350 efficiency, the laser intensity and other settings were set the same across the different genotypes  
351 for each experiment.

352

### 353 Locomotor behavior assay

354 We used the *Drosophila* Activity Monitoring system (Trikinetics, Waltham, MA, USA) to record  
355 the number of beam crosses caused by the fly in one-min intervals. Young, male flies were  
356 individually placed in glass tubes containing agar-sucrose media. The temperature was constant  
357 at 27°C for increased knock-down efficiency. Flies were allowed one day of habituation before  
358 six days of entrainment under 12:12 LD. For the determination of the evening peak timing under  
359 short days, the flies were then transferred to 6:18 LD for six additional days. Only the final four  
360 days of locomotor activity were used in our analysis. Average activity recorded from short  
361 photoperiod day 3–6 was plotted for each fly and the average evening peak time scored as  
362 described previously [47]. Statistical analysis was performed on the Prism 5 software  
363 (GraphPad) using a one-way ANOVA with a Tukey's multiple-comparisons test.

364

### 365 Functional calcium imaging

366 The calcium sensor GCaMP6f was expressed in most clock neurons using *clk856*-GAL4. Young  
367 male flies were entrained to a standard 12:12 LD to be collected at evening time between ZT9-  
368 12. Adult male fly brains were dissected in adult hemolymph-like saline (AHL) (108 mM NaCl,  
369 5 mM KCl, 2 mM CaCl<sub>2</sub>, 8.2 mM MgCl<sub>2</sub>, 4 mM NaHCO<sub>3</sub>, 1 mM NaH<sub>2</sub>PO<sub>4</sub> -H<sub>2</sub>O, 5 mM  
370 trehalose, 10 mM sucrose, 5 mM HEPES, pH 7.5; Wang, 2003 #6627). Brains were then pinned



371 to a layer of Sylgard (Dow Corning, Midland, MI) silicone under a small bath of AHL contained  
372 within a recording/perfusion chamber (Warner Instruments, Hamden, CT, RC-26G) and bathed  
373 with room temperature AHL. Brains expressing GCaMP6f were exposed to the fluorescent light  
374 for approximately one to two minutes before imaging to allow for baseline fluorescence  
375 stabilization of the LNDs. Perfusion flow was established over the brain with a gravity-fed  
376 ValveLink perfusion system (Automate Scientific, Berkeley, CA). A spinning disk confocal  
377 (Intelligent Imaging Innovations, Inc., Denver, CO) was used to visualize all the LNDs possible  
378 by recording a z-stack with a step size ranging from 2-2.5  $\mu\text{m}$ . After 10 planes of baseline  
379 recording with AHL, 10  $\mu\text{M}$  AstC (GenScript, Piscataway, New Jersey) was delivered by  
380 switching the perfusion flow until the end of the recording for a total of 30 planes.

381 For tetrodotoxin (TTX) experiments, brains were dissected with regular AHL before being  
382 pre-incubated in AHL containing 1  $\mu\text{M}$  TTX for at least 5 minutes. The brains were then  
383 recorded in the same parameters as above, with AHL+TTX (1  $\mu\text{M}$ ) as a baseline recording before  
384 exposing the brains to AstC (10  $\mu\text{M}$ ) + TTX (1  $\mu\text{M}$ ).

385 The Slidebook Reader software was used to subtract the background from the signal  
386 intensities of the regions of interest. After the background subtraction, the initial  $F/F_0$  values  
387 were exported. Based on the 10 planes of baseline recording, a bleach trend line was calculated  
388 for each sample (MATLAB 2017, MathWorks, Natick, MA), and therefore the  $F/F_0$  was adjusted  
389 to reflect any true fluorescent signal changes. Individual LND neurons were considered  
390 'responsive' if there was at least a 10% change in fluorescence signal. Statistical analysis was  
391 performed on the Prism 5 software (GraphPad) using a two-way ANOVA.

392 **Acknowledgements**

393 Many thanks to members of the Rosbash lab for several thoughtful discussions, and especially  
394 Dr. Fang Guo, Meghana Holla, and Patrick Weidner for insightful comments. Much appreciation  
395 to members of the Griffith Lab at Brandeis University, especially Johanna “Joey” Adams and Dr.  
396 Timothy Wiggin for post-hoc analysis of the functional imaging. Also, Muibat Yussuf for  
397 assistance and fly maintenance. Thanks to Dr. Orie Shafer for technical guidance. Thank you to  
398 Drs. Xi “Salina” Long, Robert Singer, and Timothee Lionnet for technical assistance with the  
399 FISH protocol and to Ed Dougherty for microscopy support. The AstC antibody was a generous  
400 gift from Dr. Jan Veenstra. We thank the Bloomington Stock Center and Vienna Drosophila  
401 RNAi Center for flies.

402

403 **Author contributions**

404 Conceptualization, M.D., M.S., K.A., and M.R.; Methodology, M.D and M.S.; Formal  
405 Analysis, M.D. and M.S.; Investigation, Visualization, and Writing- Original draft, M.D.;  
406 Writing- Review and Editing, M.S., K.A., and M.R.; Project Administration, M.S., K.A., and  
407 M.R.; Funding acquisition, M.R.

408

409 **Competing interest**

410 The authors declare no conflicts of interest.

411 **References**

- 412 1. Majercak, J., et al., *How a circadian clock adapts to seasonal decreases in temperature*  
413 *and day length*. Neuron, 1999. **24**(1): p. 219-30.
- 414 2. Yoshii, T., D. Rieger, and C. Helfrich-Forster, *Two clocks in the brain: an update of the*  
415 *morning and evening oscillator model in Drosophila*. Prog Brain Res, 2012. **199**: p. 59-  
416 82.
- 417 3. Grima, B., et al., *Morning and evening peaks of activity rely on different clock neurons of*  
418 *the Drosophila brain*. Nature, 2004. **431**(7010): p. 869-73.
- 419 4. Stoleru, D., et al., *Coupled oscillators control morning and evening locomotor behaviour*  
420 *of Drosophila*. Nature, 2004. **431**(7010): p. 862-8.
- 421 5. Renn, S.C., et al., *A pdf neuropeptide gene mutation and ablation of PDF neurons each*  
422 *cause severe abnormalities of behavioral circadian rhythms in Drosophila*. Cell, 1999.  
423 **99**(7): p. 791-802.
- 424 6. Peng, Y., et al., *Drosophila Free-Running Rhythms Require Intercellular*  
425 *Communication*. PLoS Biol, 2003. **1**(1): p. E13.
- 426 7. Lin, Y., G.D. Stormo, and P.H. Taghert, *The neuropeptide pigment-dispersing factor*  
427 *coordinates pacemaker interactions in the Drosophila circadian system*. J Neurosci,  
428 2004. **24**(36): p. 7951-7.
- 429 8. Hermann, C., et al., *Neuropeptide F immunoreactive clock neurons modify evening*  
430 *locomotor activity and free-running period in Drosophila melanogaster*. J Comp Neurol,  
431 2012. **520**(5): p. 970-87.

- 432 9. Johard, H.A., et al., *Peptidergic clock neurons in Drosophila: ion transport peptide and*  
433 *short neuropeptide F in subsets of dorsal and ventral lateral neurons*. J Comp Neurol,  
434 2009. **516**: p. 59-73.
- 435 10. Hermann-Luibl, C., et al., *The ion transport peptide is a new functional clock*  
436 *neuropeptide in the fruit fly Drosophila melanogaster*. J Neurosci, 2014. **34**(29): p. 9522-  
437 36.
- 438 11. Shafer, O.T., et al., *Reevaluation of Drosophila melanogaster's neuronal circadian*  
439 *pacemakers reveals new neuronal classes*. J Comp Neurol, 2006. **498**(2): p. 180-93.
- 440 12. Kunst, M., et al., *Calcitonin gene-related peptide neurons mediate sleep-specific*  
441 *circadian output in Drosophila*. Curr Biol, 2014. **24**(22): p. 2652-64.
- 442 13. Goda, T., et al., *Drosophila DH31 Neuropeptide and PDF Receptor Regulate Night-*  
443 *Onset Temperature Preference*. J Neurosci, 2016. **36**(46): p. 11739-11754.
- 444 14. Abruzzi, K.C., et al., *RNA-seq analysis of Drosophila clock and non-clock neurons*  
445 *reveals neuron-specific cycling and novel candidate neuropeptides*. PLoS Genet, 2017.  
446 **13**(2): p. e1006613.
- 447 15. Kreienkamp, H.J., et al., *Functional annotation of two orphan G-protein-coupled*  
448 *receptors, Drostar1 and -2, from Drosophila melanogaster and their ligands by reverse*  
449 *pharmacology*. J Biol Chem, 2002. **277**(42): p. 39937-43.
- 450 16. Price, M.D., et al., *Drosophila melanogaster flatline encodes a myotropin orthologue to*  
451 *Manduca sexta allatostatin*. Peptides, 2002. **23**(4): p. 787-94.
- 452 17. Myers, M.P., et al., *Light-induced degradation of TIMELESS and entrainment of the*  
453 *Drosophila circadian clock*. Science, 1996. **271**: p. 1736-1740.

- 454 18. Zeng, H., et al., *A light-entrainment mechanism for the Drosophila circadian clock*.  
455 Nature, 1996. **380**: p. 129-135.
- 456 19. Zitnan, D., F. Sehnaal, and P.J. Bryant, *Neurons producing specific neuropeptides in the*  
457 *central nervous system of normal and pupariation-delayed Drosophila*. Dev Biol, 1993.  
458 **156**(1): p. 117-35.
- 459 20. Guo, F., et al., *Circadian neuron feedback controls the Drosophila sleep--activity profile*.  
460 Nature, 2016. **536**(7616): p. 292-7.
- 461 21. Rieger, D., R. Stanewsky, and C. Helfrich-Forster, *Cryptochrome, compound eyes,*  
462 *Hofbauer-Buchner eyelets, and ocelli play different roles in the entrainment and masking*  
463 *pathway of the locomotor activity rhythm in the fruit fly Drosophila melanogaster*. J Biol  
464 Rhythms, 2003. **18**(5): p. 377-91.
- 465 22. Lu, B., et al., *Circadian modulation of light-induced locomotion responses in Drosophila*  
466 *melanogaster*. Genes Brain Behav, 2008. **7**(7): p. 730-9.
- 467 23. Gummadova, J.O., G.A. Coutts, and N.R. Glossop, *Analysis of the Drosophila Clock*  
468 *promoter reveals heterogeneity in expression between subgroups of central oscillator*  
469 *cells and identifies a novel enhancer region*. J Biol Rhythms, 2009. **24**(5): p. 353-67.
- 470 24. Liang, X., T.E. Holy, and P.H. Taghert, *A Series of Suppressive Signals within the*  
471 *Drosophila Circadian Neural Circuit Generates Sequential Daily Outputs*. Neuron, 2017.  
472 **94**(6): p. 1173-1189 e4.
- 473 25. Liang, X., T.E. Holy, and P.H. Taghert, *Synchronous Drosophila circadian pacemakers*  
474 *display nonsynchronous Ca(2)(+) rhythms in vivo*. Science, 2016. **351**(6276): p. 976-81.
- 475 26. Helfrich-Forster, C., *The neuroarchitecture of the circadian clock in the brain of*  
476 *Drosophila melanogaster*. Microsc Res Tech, 2003. **62**(2): p. 94-102.

- 477 27. Birgul, N., et al., *Reverse physiology in drosophila: identification of a novel allatostatin-*  
478 *like neuropeptide and its cognate receptor structurally related to the mammalian*  
479 *somatostatin/galanin/opioid receptor family*. *Embo j*, 1999. **18**(21): p. 5892-900.
- 480 28. Lenz, C., M. Williamson, and C.J. Grimmelikhuijzen, *Molecular cloning and genomic*  
481 *organization of a second probable allatostatin receptor from Drosophila melanogaster*.  
482 *Biochem Biophys Res Commun*, 2000. **273**(2): p. 571-7.
- 483 29. Shafer, O.T., et al., *Widespread receptivity to neuropeptide PDF throughout the neuronal*  
484 *circadian clock network of Drosophila revealed by real-time cyclic AMP imaging*.  
485 *Neuron*, 2008. **58**(2): p. 223-37.
- 486 30. Williamson, M., et al., *Molecular cloning, genomic organization, and expression of a C-*  
487 *type (Manduca sexta-type) allatostatin preprohormone from Drosophila melanogaster*.  
488 *Biochem Biophys Res Commun*, 2001. **282**(1): p. 124-30.
- 489 31. Veenstra, J.A., *Allatostatin C and its paralog allatostatin double C: The arthropod*  
490 *somatostatins*. *Insect Biochemistry and Molecular Biology*, 2009. **39**(3): p. 161-170.
- 491 32. Veenstra, J.A., *Allatostatins C, double C and triple C, the result of a local gene*  
492 *triplication in an ancestral arthropod*. *General and Comparative Endocrinology*, 2016.  
493 **230-231**: p. 153-157.
- 494 33. Tanaka, M., et al., *Somatostatin neurons form a distinct peptidergic neuronal group in*  
495 *the rat suprachiasmatic nucleus: a double labeling in situ hybridization study*. *Neurosci*  
496 *Lett*, 1996. **215**(2): p. 119-22.
- 497 34. Fukuhara, C., et al., *Phase advances of circadian rhythms in somatostatin depleted rats:*  
498 *effects of cysteamine on rhythms of locomotor activity and electrical discharge of the*  
499 *suprachiasmatic nucleus*. *J Comp Physiol A*, 1994. **175**(6): p. 677-85.

- 500 35. Biemans, B.A., M.P. Gerkema, and E.A. Van der Zee, *Increase in somatostatin*  
501 *immunoreactivity in the suprachiasmatic nucleus of aged Wistar rats*. Brain Res, 2002.  
502 **958**(2): p. 463-7.
- 503 36. Funk, C.M., et al., *Role of Somatostatin-Positive Cortical Interneurons in the Generation*  
504 *of Sleep Slow Waves*. J Neurosci, 2017. **37**(38): p. 9132-9148.
- 505 37. Dulcis, D., et al., *Neurotransmitter switching in the adult brain regulates behavior*.  
506 Science, 2013. **340**(6131): p. 449-53.
- 507 38. Deats, S.P., W. Adidharma, and L. Yan, *Hypothalamic dopaminergic neurons in an*  
508 *animal model of seasonal affective disorder*. Neurosci Lett, 2015. **602**: p. 17-21.
- 509 39. Dumbell, R.A., et al., *Somatostatin Agonist Pasireotide Promotes a Physiological State*  
510 *Resembling Short-Day Acclimation in the Photoperiodic Male Siberian Hamster*  
511 *(Phodopus sungorus)*. J Neuroendocrinol, 2015. **27**(7): p. 588-99.
- 512 40. Kaneko, M. and J.C. Hall, *Neuroanatomy of cells expressing clock genes in Drosophila:*  
513 *Transgenic manipulation of the period and timeless genes to mark the perikarya of*  
514 *circadian pacemaker neurons and their projections*. The Journal of Comparative  
515 Neurology, 2000. **422**(1): p. 66-94.
- 516 41. Zhang, Y., et al., *Light and temperature control the contribution of specific DNI neurons*  
517 *to Drosophila circadian behavior*. Curr Biol, 2010. **20**(7): p. 600-5.
- 518 42. Freeman, M., *Reiterative use of the EGF receptor triggers differentiation of all cell types*  
519 *in the Drosophila eye*. Cell, 1996. **87**(4): p. 651-60.
- 520 43. Bahn, J.H., G. Lee, and J.H. Park, *Comparative analysis of Pdf-mediated circadian*  
521 *behaviors between Drosophila melanogaster and D. virilis*. Genetics, 2009. **181**(3): p.  
522 965-75.

- 523 44. Guo, F., X. Chen, and M. Rosbash, *Temporal calcium profiling of specific circadian*  
524 *neurons in freely moving flies*. Proc Natl Acad Sci U S A, 2017. **114**(41): p. E8780-  
525 E8787.
- 526 45. Abruzzi, K., et al., *RNA-seq Profiling of Small Numbers of Drosophila Neurons*. Methods  
527 Enzymol, 2015. **551**: p. 369-86.
- 528 46. Long, X., et al., *Quantitative mRNA imaging throughout the entire Drosophila brain*. Nat  
529 Methods, 2017. **14**(7): p. 703-706.
- 530 47. Schlichting, M. and C. Helfrich-Forster, *Photic entrainment in Drosophila assessed by*  
531 *locomotor activity recordings*. Methods Enzymol, 2015. **552**: p. 105-23.
- 532
- 533



534 **Figure Legends**

535 **Figure 1.** mRNA sequencing data suggests that *Allatostatin C* (*AstC*) mRNA is expressed in the  
536 circadian neurons of *Drosophila*. **a.** One hemisphere of the clock neurons in an adult *Drosophila*  
537 brain are depicted schematically. The core clock consists of about 150 lateral and dorsal neurons  
538 (LNs and DNs, respectively). The ventral LNs are subdivided in the small (s-LNvs) and large  
539 neurons (l-LNvs), shown in light and dark green, respectively. The dorsal LNs (LNds) consists  
540 of six neurons and the 5<sup>th</sup> s-LNv, shown in orange. The DNs are subclassified into the  
541 approximate 16 DN1s (shown in purple), two DN2s (shown in yellow), and approximately 30-40  
542 DN3s (shown in blue). The three lateral posterior neurons (LPNs) form the last cluster (shown in  
543 gray). **b.** Amount of *AstC* mRNA transcripts in the three neuronal clusters profiled with deep  
544 sequencing: the LNvs, LNds (including the 5<sup>th</sup> s-LNv), and the posterior DN1s. The DN1s have  
545 significantly more *AstC* transcripts compared to the LNvs and LNds. Values were averaged from  
546 12 sequencing data sets across different timepoints and biological replicates. Boxplot whiskers  
547 show 10<sup>th</sup>-90<sup>th</sup> percentile. “+” denotes the mean. \*\*\*  $p < 0.0001$ , one-way ANOVA

548  
549 **Figure 2.** Visualizing *AstC* in the clock neurons of the adult *Drosophila* brain. **a.** Fluorescent *in*  
550 *situ* hybridization (FISH) for *AstC* mRNA transcripts at ZT24. **b.** TIM antibody staining showing  
551 the dorsal clock neurons. **c.** FISH coupled with immunostaining shows the co-localization of  
552 *AstC* mRNA transcripts (red) and TIM antibody (green), revealing *AstC* transcripts in four  
553 DN1ps (purple arrows), three LPNs (white arrows), and the DN3s (blue bracket). **d.**  
554 Immunostaining of the *AstC* neuropeptide at ZT20. The posterior medial protocerebral 2 (PMP2,  
555 asterisk) are previously known to contain *AstC*. **e.** TIM antibody staining showing the dorsal  
556 clock neurons. **f.** Co-localization of *AstC* neuropeptide (red) is indeed expressed in a subset of

557 the dorsal clock neurons (anti-TIM, green): four DN1ps (purple arrows), three LPNs (white  
558 arrows), and the DN3s (blue bracket). Images are from maximum projections. Only the posterior,  
559 dorsal region of one hemisphere are shown here. See also Figure S1.

560

561 **Figure 3.** AstC cycles in the DN1ps. Young males flies expressing GFP in a subset of the DN1ps  
562 (*clk4.1-GAL4*) were entrained to six timepoints throughout the day under a 12:12 light:dark (LD)  
563 cycle. **a.** Representative images of the DN1ps immunolabeled with anti-AstC (red) and GFP  
564 (green). The arrowheads indicate which four AstC-expressing neurons co-localize as the DN1ps.  
565 **b.** Normalized quantification of AstC cycling in the DN1ps under 12:12 LD cycle (dashed, open  
566 circles) and the second day of constant darkness (DD, solid, closed circles). AstC is more  
567 abundant during the dark phase in comparison to the light phase. Two biological replicates are  
568 double-plotted. Error bars are SEM. Images are from maximum projections.  $n \geq 5$  brains per  
569 condition. Scale bar= 5 $\mu$ m. See also Figure S2.

570

571 **Figure 4.** AstC in clock neurons regulates evening phase in short photoperiod days. **a.**  
572 Normalized averaged actograms of the *tim-GAL4* control (black, n=38), *AstC-RNAi* control  
573 (gray, n=51), and the *AstC RNAi* knock-down in all clock cells mediated by *tim-GAL4* (red,  
574 n=40) under standard 12:12 light:dark (LD) conditions at 27°C. White and dark boxes indicates  
575 the respective light and dark phases. The error bars represent SEM. **b.** Boxplot distribution  
576 showing the evening peak phase from individual flies. There are no significant differences ( $p \geq$   
577 0.05). **c.** Normalized averaged actograms of the *tim-GAL4* control, *AstC-RNAi* control, and the  
578 *AstC RNAi* knock-down in all clock cells mediated by *tim-GAL4* under short photoperiods of  
579 6:18 LD at 27°C. The red arrow denotes the delay of the evening peak when *AstC* is knocked-

580 down compared to the two genetic controls. **d.** Boxplot distribution showing the evening peak  
581 phase from individual flies. The *tim*-GAL4 mediated *AstC*-RNAi knock-down (red) is  
582 significantly delayed compared to both the *tim*-GAL4 control (black) and *AstC*-RNAi control  
583 (gray;  $p < 0.0001$ ). These data are combined from two independent biological replicates. \*\*\*  $p <$   
584  $0.0001$ . n.s. no significant difference ( $p \geq 0.05$ ). “+” indicates the mean and the whiskers denotes  
585 the 10<sup>th</sup>/90<sup>th</sup> percentiles. See also Figures S3, S4, S5, and S6.

586

587 **Figure 5.** *AstC*-R2 in LNds is required to regulate evening phase in short photoperiod days. **a.**  
588 Normalized averaged actograms of the *dvPDF*-GAL4, *PDF*-GAL80 control (gray, n=26), *AstC*  
589 *R2*-RNAi control (black, n=15), and the *AstC* *R2*-RNAi knock-down in the LNds mediated by  
590 *dvPDF*-GAL4, *PDF*-GAL80 (orange, n=21) under standard 12:12 LD condition at 27°C. White  
591 and dark boxes indicate the respective light and dark phases. The error bars represent SEM. **b.**  
592 Boxplot distribution showing the evening peak phase from individual flies. There are no  
593 significant differences ( $p \geq 0.05$ ). **c.** Normalized averaged actograms of the *dvPDF*-GAL4, *PDF*-  
594 GAL80 control, *AstC* *R2*-RNAi control, and the *AstC* *R2* RNAi knock-down in the LNds  
595 mediated by *dvPDF*-GAL4, *PDF*-GAL80 under short photoperiod of 6:18 LD at 27°C. The  
596 orange arrow denotes the delay of the evening peak when *AstC* *R2* is knocked-down compared  
597 to the two genetic controls. **d.** Boxplot distribution showing the evening peak phase from  
598 individual flies. The *dvPDF*-GAL4, *PDF*-GAL80 mediated *AstC* *R2*-RNAi knock-down  
599 (orange) is significantly delayed compared to both the *dvPDF*-GAL4, *PDF*-GAL80 control  
600 (gray) and *AstC* *R2*-RNAi control (black;  $p < 0.001$ ). \*\*  $p < 0.001$ . n.s. no significant difference  
601 ( $p \geq 0.05$ ). “+” indicates the mean and the whiskers denotes the 10<sup>th</sup>/90<sup>th</sup> percentiles. See also  
602 Figure S7.

603  
604 **Figure 6.** Functional calcium imaging of the LNds responding to AstC (10  $\mu$ M). Flies expressing  
605 the calcium sensor GCaMP6 in most clock neurons (*clk856-GAL4*> UAS-GCaMP6f) were  
606 collected in the evening, ZT9-12, and brains were explanted. **a.** A baseline recording of the LNds  
607 was obtained for 10 planes (ai). When the synthetic AstC peptide (10  $\mu$ M) was added into the  
608 bath, a substantial decrease in fluorescence was observed in multiple LNd neurons (aai, denoted  
609 by asterisks). **b.** Quantification of the fluorescence relative to the initial baseline recording ( $F/F_0$ )  
610 over time. The LNd neurons showed either a significant decrease in calcium (orange,  
611 ‘Responsive LNds’) or were unaffected (light gray, ‘Non-responsive LNds’). **c.** To address  
612 whether AstC directly inhibited the LNds, the same experiment was conducted with the sodium  
613 channel blocker tetrodotoxin (TTX) added to the bath. Similar to (a), a baseline recording was  
614 obtained for the LNds (ci) before exposing the brains to AstC (cii). The asterisk denotes the  
615 single LNd neuron that showed a significant decrease in calcium in response to the AstC  
616 treatment. **d.** the quantification of the direct inhibition of AstC onto a single LNd neuron (red,  
617 ‘Responsive LNds’). Most LNd neurons were unaffected.  $n = 6$  brains per condition. \*  $p < 0.05$ ,  
618 \*\*\*  $p < 0.001$ , two-way ANOVA.

619  
620 **Figure 7.** Proposed model for AstC/AstC-R2 signaling in the circadian circuitry of *Drosophila*.  
621 **A.** The DN3s are the integrator for light/dark duration to sense changes in photoperiod  
622 conditions. AstC solely in the DN3s inhibits a single LNd neuron via AstC-R2 to regulate the  
623 evening phase, as revealed under short photoperiod. **B.** It is unclear which group of clock  
624 neurons serves as the critical integrator of the different photoperiod conditions. Due to lack of a  
625 DN3-specific driver, we propose this second model: a combination of the AstC-containing

626 DN1ps, DN3s, and LPNs, together inhibit an LN<sub>d</sub> neuron to regulate the evening peak,  
627 indicating a functional redundancy in neuropeptide signaling. *C.* The functional role of AstC is to  
628 precisely regulate the evening phase, as seen under short photoperiod condition. Because the  
629 reduction of AstC leads to a delay in the evening phase, AstC must normally act to regulate the  
630 locomotor evening offset.

631 **Supplemental figures**

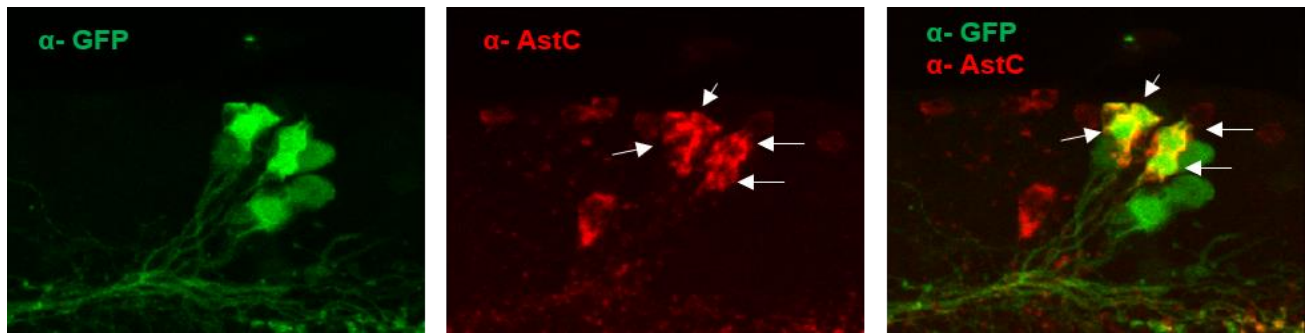

632 **Figure S1-** AstC is found in glutamatergic DN1ps. Related to Figure 2. A subset of the DN1ps known to contain  
633 glutamate (*R51H05-GAL4*) was labeled with GFP and co-immunostained with AstC antibodies at ZT14. Co-  
634 localization of the two signals indicates that AstC is found in four glutamatergic DN1ps. Non-clock neurons also  
635 expressing AstC are found nearby.

636

637  
638  
639  
640  
641  
642  
643  
644  
645  
646  
647  
648  
649  
650  
651

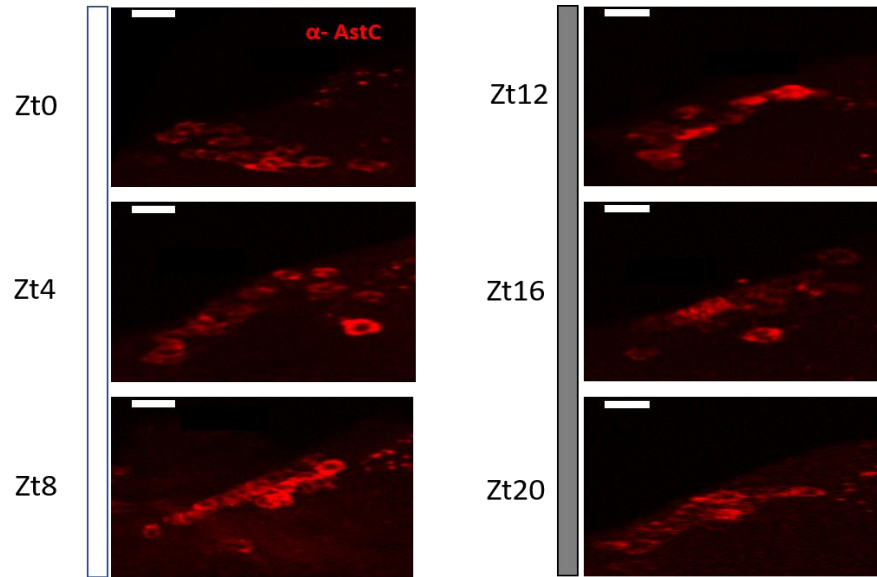

**Figure S2-** AstC in the DN3s can always be visualized across timepoints. Related to Figure 3. Flies were collected across six timepoints in a standard 12:12 LD cycle. Representative images of the DN3s show that AstC is always visible in the cluster. Scale bar= 5 $\mu$ m.

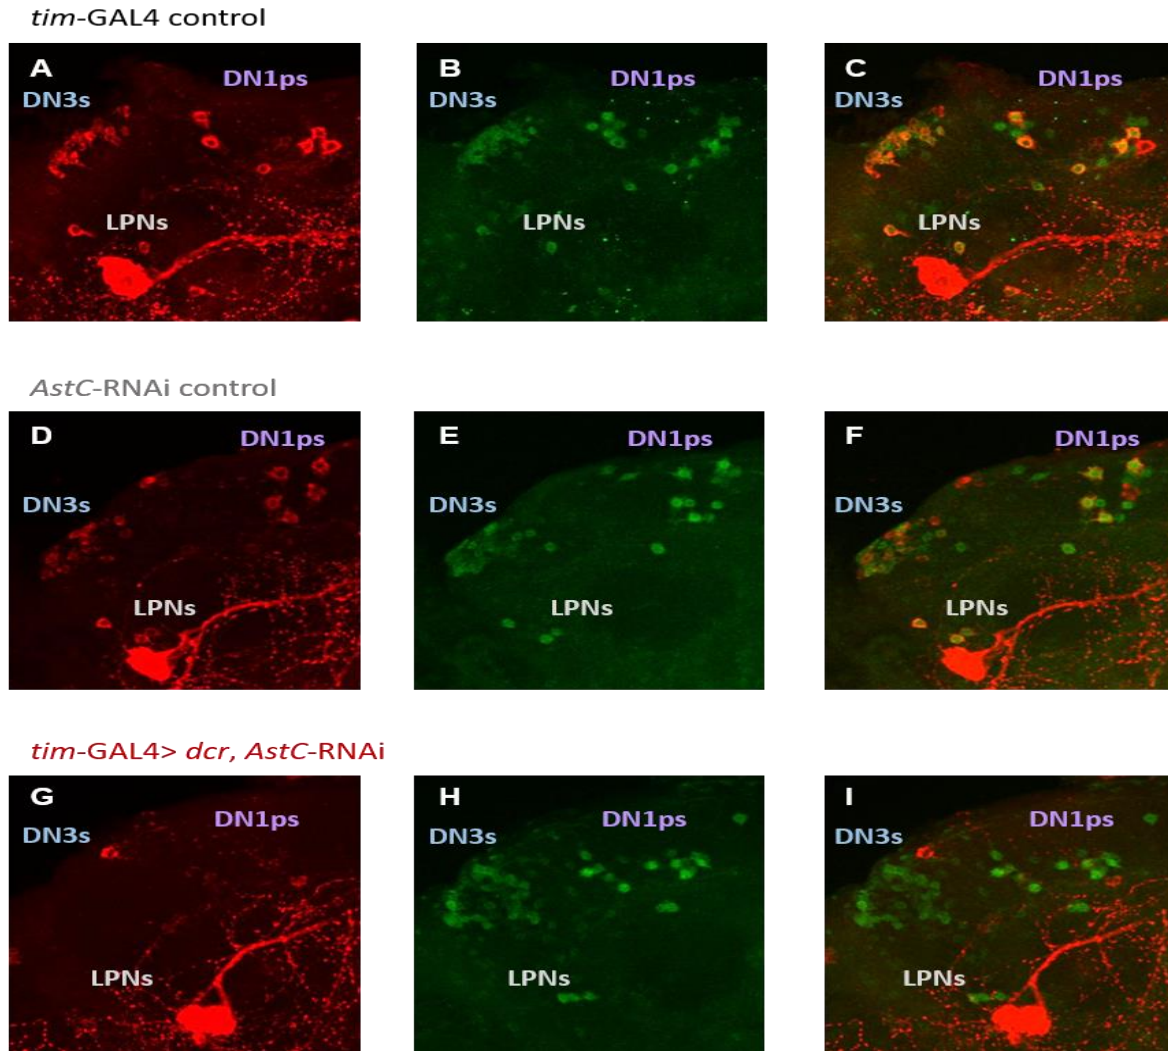

652

653 **Figure S3-** Immunostaining validation of *AstC* RNAi knock-down in all clock cells. Related to Figure 4. *AstC*-  
654 RNAi was expressed with *tim-GAL4*>*dcr* to efficiently knock-down *AstC* peptide in all clock cells. The GAL4  
655 control (A-C), UAS control (D-F), and the experimental knock-down genotype (G-I) were stained with anti-*AstC*  
656 (red) and anti-TIM (green) at ZT20. *A-F*, For both parental controls, *AstC* is expressed in four DN1ps,  
657 approximately half the DN3s, and the three LPNs. *G-I*, *AstC* expression is abolished in all clock neurons in the  
658 experimental knock-down group. At least eight brains of each genotype were stained together under the same  
659 conditions. Confocal settings were maintained the same for all genotypes.

660



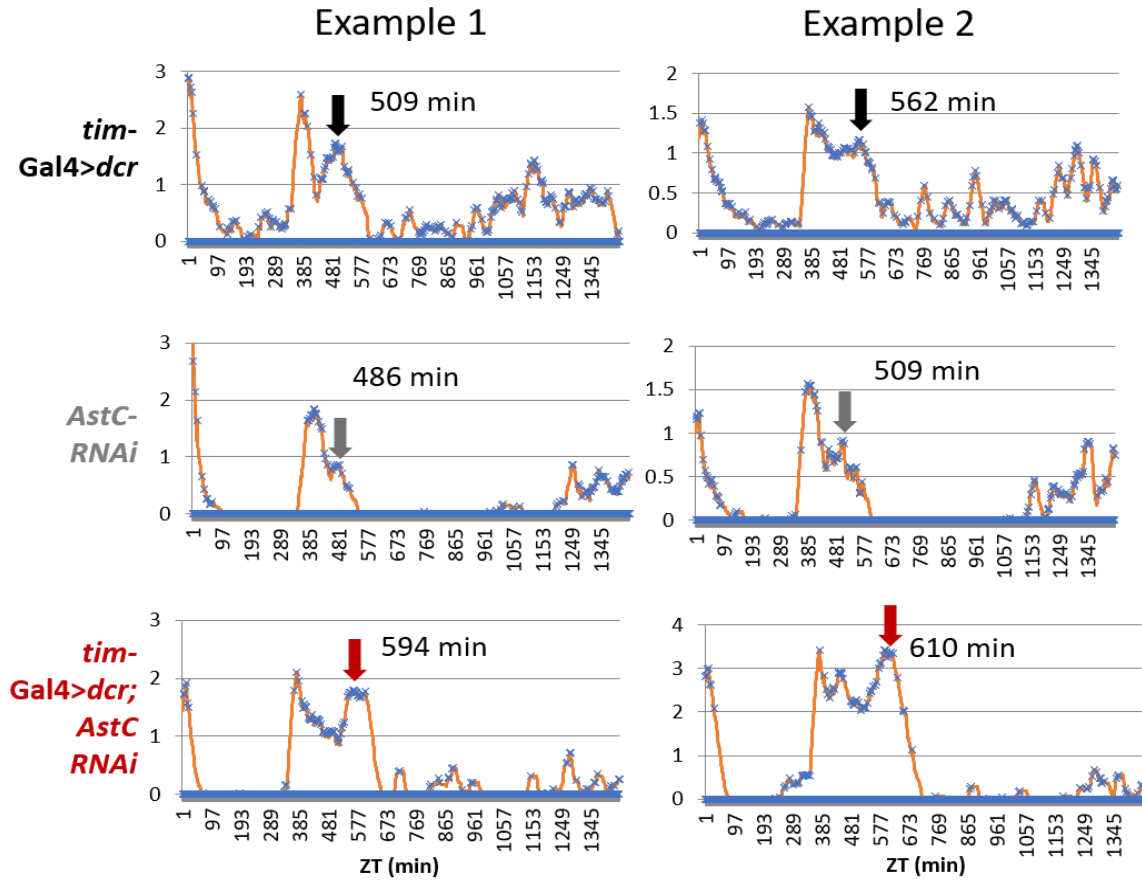

661

662 **Figure S4-** Representative actograms in 6:18 LD. Related to Figure 4. Averaged actograms from two individual  
663 flies are shown for the *tim*-GAL4 control (top, black), the *AstC*-RNAi control (middle, gray), and the experimental  
664 group with *AstC* knocked-down in all clock neurons (bottom, red). The arrows indicate the timing of the maximum  
665 E-peak considered for analysis. Actograms averaged from Days 3-6 in 6:18 LD. Y-axis measures total activity  
666 counts per minute.

667

668

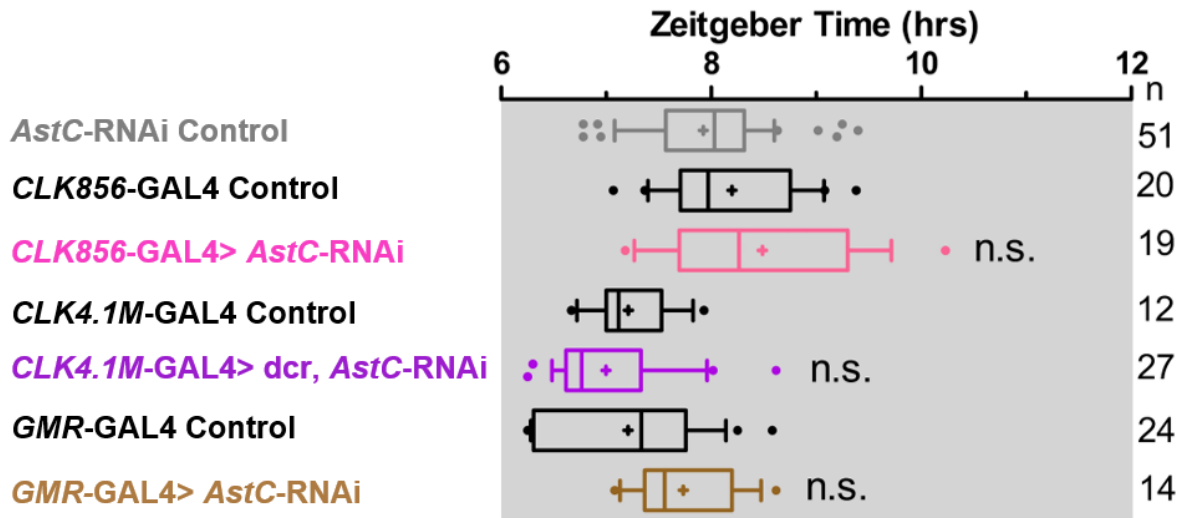

669 **Figure S5-** *AstC* knock-down in subsets of clock neurons has no significant effects in E-peak under short  
 670 photoperiod. Related to Figure 4. Boxplot distribution showing the evening peak phase measured from individual  
 671 flies. The *clk856*-GAL4 mediated *AstC*-RNAi knock-down (pink) is not significantly different to both parental  
 672 controls. *AstC* knock-down mediated by *CLK4.1M*-GAL4 (purple) and *GMR*-GAL4 (brown) also showed no  
 673 significant differences compared to their respective parental controls. n.s. no significant difference ( $p \geq 0.05$ ). “+”  
 674 indicates the mean and the whiskers denotes the 10<sup>th</sup>/90<sup>th</sup> percentiles.

675

*clk856*-GAL4 control

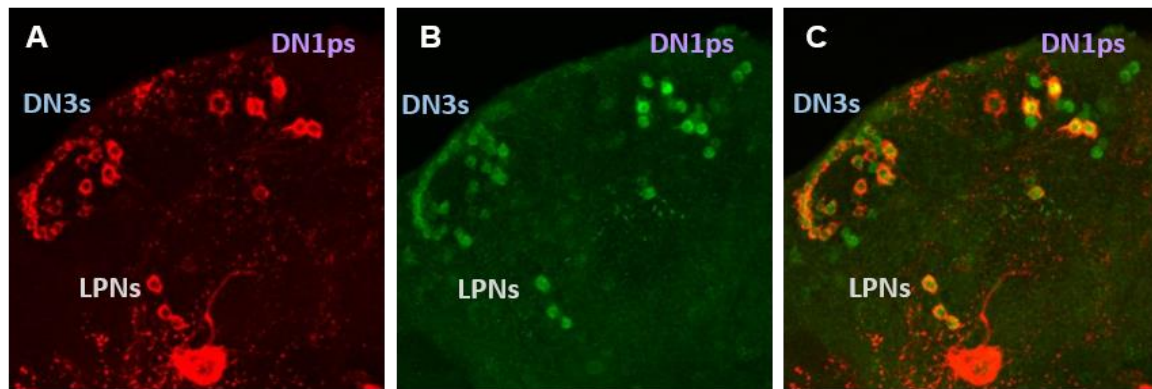

*AstC*-RNAi control

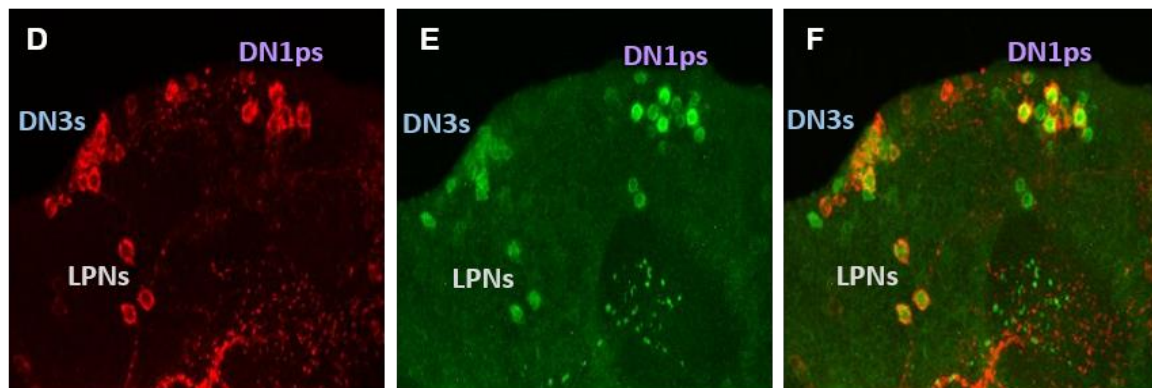

*clk856*-GAL4 > *dcr*, *AstC*-RNAi

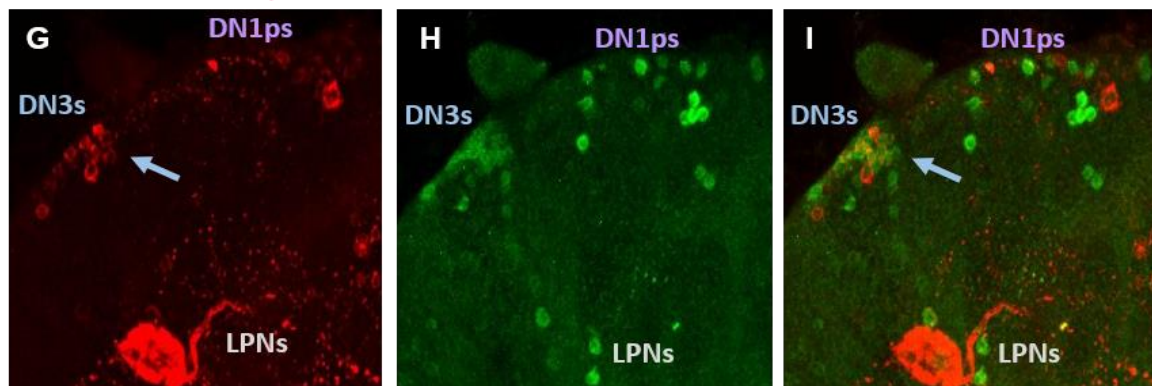

676

677 **Figure S6-** Immunostaining of *CLK856*-GAL4 mediated *AstC* knock-down reveals ~11-13 DN3s are unaffected.

678 Related to Figure 4 and S5. The GAL4 control (A-C), UAS control (D-F), and the experimental knock-down

679 genotype (G-I) were stained with anti-*AstC* (red) and anti-TIM (green) at ZT20. **A-F**, For both parental controls,

680 *AstC* is expressed in four DN1ps, approximately half the DN3s, and the three LPNs. **G-I**, *AstC* expression is

681 abolished only in the DN1ps and LPNs. Approximately 11-13 DN3s still express *AstC*, denoted by the arrow. At

682 least eight brains of each genotype were stained together under the same conditions. Confocal settings were  
683 maintained the same for all genotypes.

684

685

686

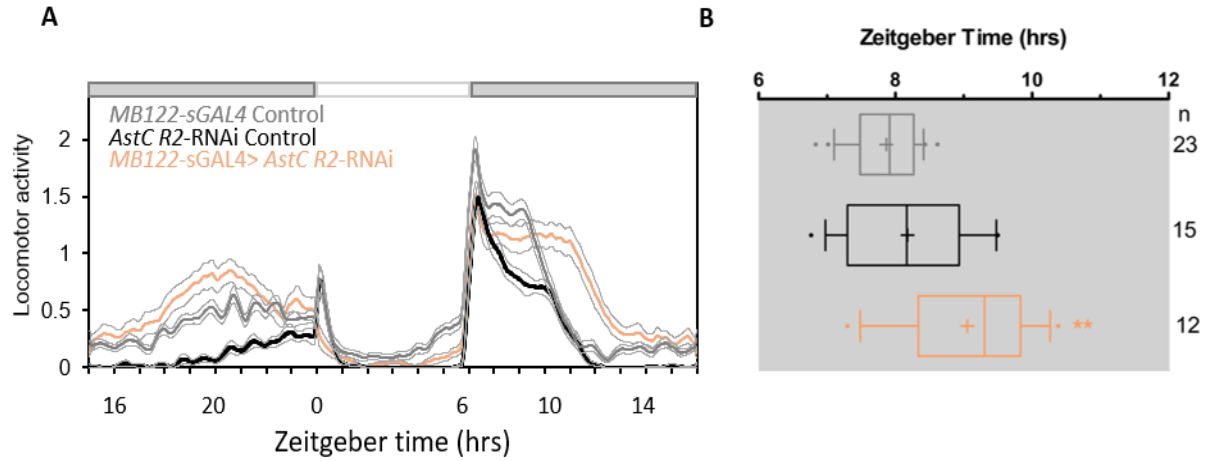

687

688 **Figure S7-** AstC-R2 in LNDs is required to regulate evening phase in short photoperiod days. Related to Figure 5. A,  
689 Averaged actograms of the *MB122-sGAL4* control (gray, n=23), *AstC R2-RNAi* control (black, n=15), and the *AstC*  
690 *R2-RNAi* knock-down in the LNDs mediated by *MB122-sGAL4* (orange, n=12) under short photoperiod 6:18 LD at  
691 27°C. White and dark boxes indicates the respective light and dark phases. Light gray lines represent SEM. **B**,  
692 Boxplot distribution showing the evening peak phase from individual flies. The *MB122-sGAL4* mediated *AstC R2-*  
693 *RNAi* knock-down (orange) is significantly delayed compared to both the *MB122-sGAL4* control (gray) and *AstC*  
694 *R2-RNAi* control (black;  $p < 0.001$ ). \*\*  $p < 0.001$ . n.s. no significant difference ( $p \geq 0.05$ ). “+” indicates the mean  
695 and the whiskers denotes the 10<sup>th</sup>/90<sup>th</sup> percentiles.
